# Supplementary material for: Bottom-up in situ formation of Fe3O4 nanocrystals in a porous carbon foam for lithium-ion battery anodes
Source: Royal Society of Chemistry journal article supplement (doi:10.1039/c1jm13450g), 2011-01-01
Supplement: c1jm13450g.pdf [file c1jm13450g.pdf]

# Bottom-up *in-situ* Formation of Fe<sub>3</sub>O<sub>4</sub> Nanocrystals in A Porous Carbon-Foam for Lithium-Ion Battery Anode Application

Taegyun Yoon<sup>a</sup>, Changju Chae<sup>a</sup>, Yang-Kook Sun<sup>b</sup>, Xin Zhao<sup>c</sup>, Harold H. Kung<sup>c</sup>, Jung Kyoo Lee<sup>\*a</sup>

<sup>a</sup>Department of Chemical Engineering, Dong-A University, Busan 604-714, Korea,

<sup>b</sup>Department of Energy Engineering, Hanyang University, Seoul 133-791, Korea,

<sup>c</sup>Department of Chemical and Biological Engineering, Northwestern University, Illinois 60208-312, USA

## Supplementary Information

### Energy-dispersive X-ray analysis of carbon foam (CF)

The removal of silica template (80nm, Nanostructured & Amorphous Materials Inc. USA) in the silica/carbon composite was examined by energy-dispersive X-ray analysis (EDX) measurement. The EDX spectra (Figure S1) examined on a large and a spot area on the CF revealed that the silica template was removed completely by HF etching followed by repeated DI washing.

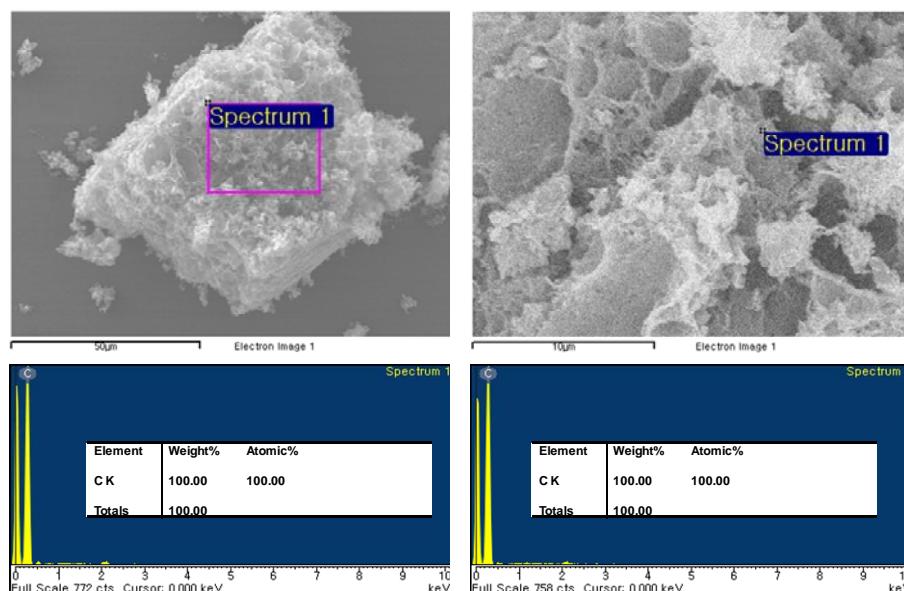

**Figure S1.** Energy-dispersive X-ray analysis of carbon foam. EDX scan on a large (left column) and a spot area on the carbon foam (right column), showing the complete removal of silica template by HF etching followed by repeated DI washing.

## FE-SEM images of carbon foam (CF)

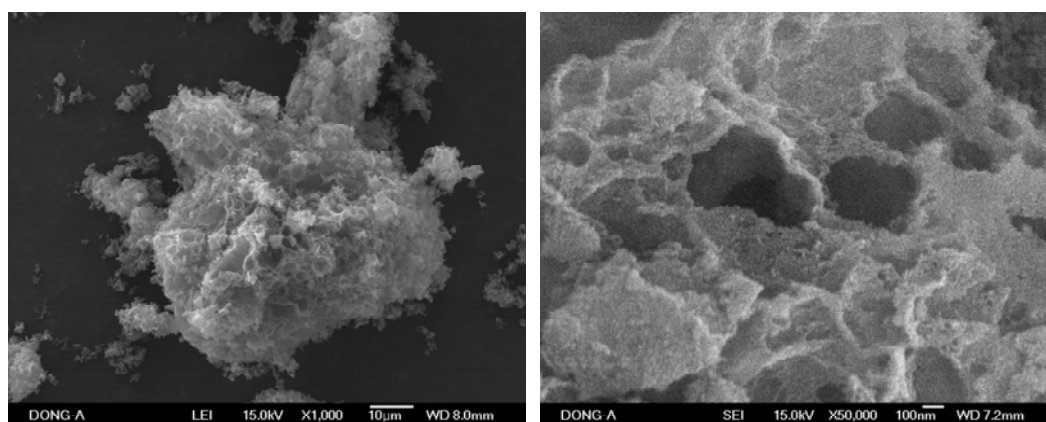

**Figure S2.** FE-SEM images of CF obtained at low (left) and high magnification (right). In the high magnification image, pores generated by silica nanoparticles of 80 nm can be observed together with large pores generated by aggregates of silica nanoparticles.

## Magnetic property of $\text{Fe}_3\text{O}_4/\text{CF}$

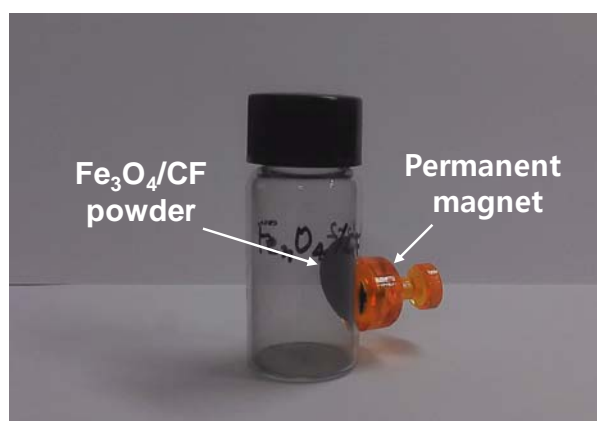

**Figure S3.** Photograph of  $\text{Fe}_3\text{O}_4/\text{CF}$  powder attached on a glass vial wall by a permanent magnet.

## TEM image of $\text{Fe}_3\text{O}_4/\text{CF}$

In the  $\text{Fe}_3\text{O}_4/\text{CF}$  sample, some of large  $\text{Fe}_3\text{O}_4$  nanocrystals formed on the surface of CF are observed as shown in Figure S4. From the TEM observation, about 10% of  $\text{Fe}_3\text{O}_4$  nanocrystals are present on the external surface of CF. Better controlled impregnation of  $\text{Fe}(\text{NO}_3)_3$  solution (impregnation of smaller portion of  $\text{Fe}(\text{NO}_3)_3$  solution at a time) can prevent  $\text{Fe}_3\text{O}_4$  nanocrystals formation on the external surface of CF thus can give more stable cycling performance of  $\text{Fe}_3\text{O}_4/\text{CF}$ .

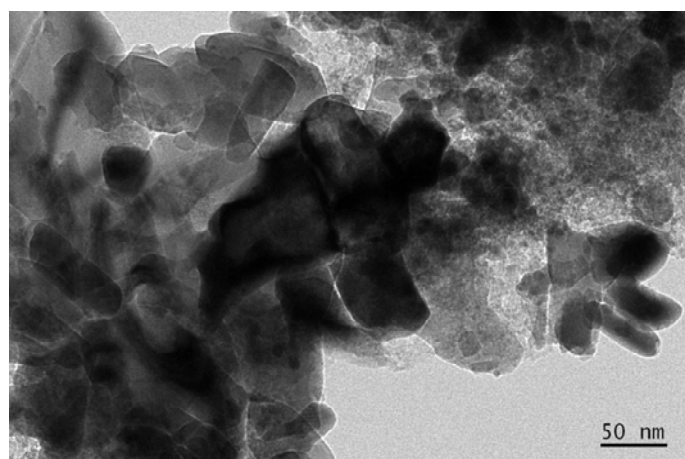

**Figure S4.** FE-SEM images of Fe<sub>3</sub>O<sub>4</sub>/CF showing large Fe<sub>3</sub>O<sub>4</sub> nanocrystals formed on the external surface of CF.

### XPS analysis of Fe(NO<sub>3</sub>)<sub>3</sub>/CF

To obtain surface chemical information of Fe(NO<sub>3</sub>)<sub>3</sub>/CF sample, XPS analysis was conducted and the spectrum is shown in Figure S5. The O1s peak at 530.71 eV is predominant in the sample and the N1s peak is observed at 405.55 eV. Fe shows two peaks at 710.3 and 724.5 eV, corresponding to trivalent Fe<sub>2p3/2</sub> and Fe<sub>2p1/2</sub>, respectively (inset of Figure S5). From the peak area of O1s and from the area ratio of N1s to Fe2P3, Fe is present presumably in the form of Fe(NO<sub>3</sub>)<sub>x</sub>(OH)<sub>y</sub>·zH<sub>2</sub>O in the Fe(NO<sub>3</sub>)<sub>3</sub>/CF.

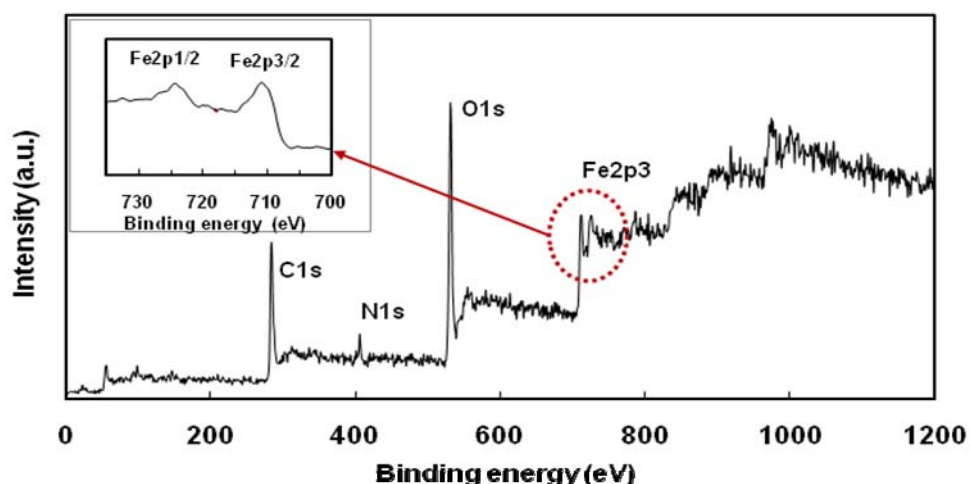

**Figure S5.** XPS spectrum obtained on the Fe(NO<sub>3</sub>)<sub>3</sub>/CF sample. Inset shows trivalent Fe2p3/2 and Fe2p1/2 peaks at 710.3 and 724.5 eV, respectively.

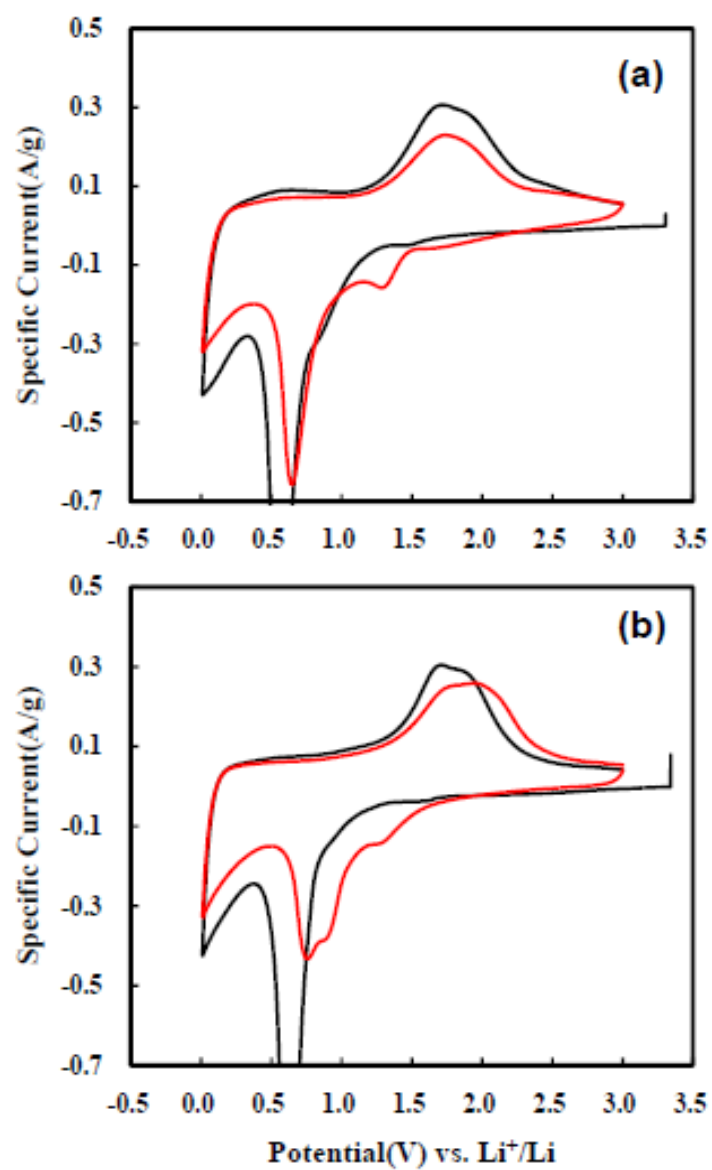

**Figure S6.** Cyclic voltammograms of (a) Fe<sub>3</sub>O<sub>4</sub> nanocrystals and (b) Fe<sub>3</sub>O<sub>4</sub>/CF. Black line denotes for the 1<sup>st</sup> cycle and red line for the 2<sup>nd</sup> cycle.
